# Supplementary material
Source: bioRxiv or medRxiv preprint supplement (https://www.biorxiv.org/highwire/filestream/5064/field_highwire_adjunct_files/0/019356-1.pdf)
Supplement: Supplementary file [file 019356-1.pdf]

## Supplementary Information

### Supplementary Note 1: Data and software availability

The software of analysis pipelines and data are provided in

(<http://www.genomicsresearch.org/public/researcher/npAnalysis/>). A script for each analysis (species detection, MLTS typing, strain typing and antibiotic resistance profile is provided). Parameters for the tools are also included in these scripts. All data is deposited in the Sequence Read Archive:

<http://www.ebi.ac.uk/ena/data/view/ERP010377>. The source code of the software is publicly available in github repository japsa (<https://github.com/mdcao/japsa>).

### Supplementary Note 2: Phylogenetic analysis of *Klebsiella pneumoniae* and *Klebsiella variicola* strains

We examined evolutionary relationship of the *K.pneumoniae* strain ATCC-700603 with a number of *K.pneumoniae* and *Klebsiella variicola* strains. We collected the assembly of the *K.pneumoniae* strain ATCC-700603, together with the assemblies of nine *K.pneumoniae* and five *K.variicola* strains from Genbank (See Supplementary Table 1). We included the genomes of an *Escherichia coli* strain and a *Staphylococcus aureus* strain as the out-groups. We then used XMDistance<sup>1</sup> to estimate the genetic distance matrix of these strains and generated the phylogenetic tree using neighbour joining method<sup>2</sup> from PHYLIP package<sup>3</sup>. In this phylogeny, the eight *K.pneumoniae* strains (1084, CG43, HS11286, JM45, KTCT2242, MGH 78578, NTUH K2044 and SB3432) were grouped together into one cluster, while strain 342 was grouped together with the six *K.variicola* strains, which is consistent with the recent suggestion that this strain was a misclassification<sup>4</sup>. Our analysis also showed that strain ATCC-700603 was an ancestor of the other *K.pneumoniae* and *K.variicola* strains which explains the shared identity of its genome.

Supplementary Table 1: List of bacterial strains used in the phylogenetic analysis of *Klebsiella pneumoniae* strain ATCC-700603.

| <b>Strain</b>                                      | <b>Assembly ID</b> | <b>Assembly status</b> |
|----------------------------------------------------|--------------------|------------------------|
| <i>Klebsiella pneumoniae</i> ATCC-700603           | GCA_000349245.1    | Contig                 |
| <i>Klebsiella pneumoniae</i> 1084                  | GCA_000294365.1    | Complete               |
| <i>Klebsiella pneumoniae</i> 342                   | GCA_000019565.1    | Complete               |
| <i>Klebsiella pneumoniae</i> CG43                  | GCA_000474015.1    | Complete               |
| <i>Klebsiella pneumoniae</i> HS11286               | GCA_000240185.2    | Complete               |
| <i>Klebsiella pneumoniae</i> JM45                  | GCA_000445405.1    | Complete               |
| <i>Klebsiella pneumoniae</i> KCTC 2242             | GCA_000220485.1    | Complete               |
| <i>Klebsiella pneumoniae</i> MGH 78578             | GCA_000016305.1    | Complete               |
| <i>Klebsiella pneumoniae</i> NTUH K2044            | GCA_000009885.1    | Complete               |
| <i>Klebsiella pneumoniae</i> SB3432                | GCA_000967845.1    | Complete               |
| <i>Klebsiella variicola</i> AT-22                  | GCA_000025465.1    | Complete               |
| <i>Klebsiella variicola</i> DX120E                 | GCA_000812205.1    | Complete               |
| <i>Klebsiella variicola</i> DSM 15968              | GCA_000828055.1    | Complete               |
| <i>Klebsiella variicola</i> BZ19                   | GCA_000742915.1    | Contig                 |
| <i>Klebsiella variicola</i> 801                    | GCA_000826565.1    | Contig                 |
| <i>Klebsiella variicola</i> 8917                   | GCA_000941635.1    | Contig                 |
| <i>Escherichia coli</i> str. K-12 substr. MG1655   | GCA_000005845.2    | Complete               |
| <i>Staphylococcus aureus</i> subsp. aureus MRSA252 | GCA_000011505.1    | Complete               |

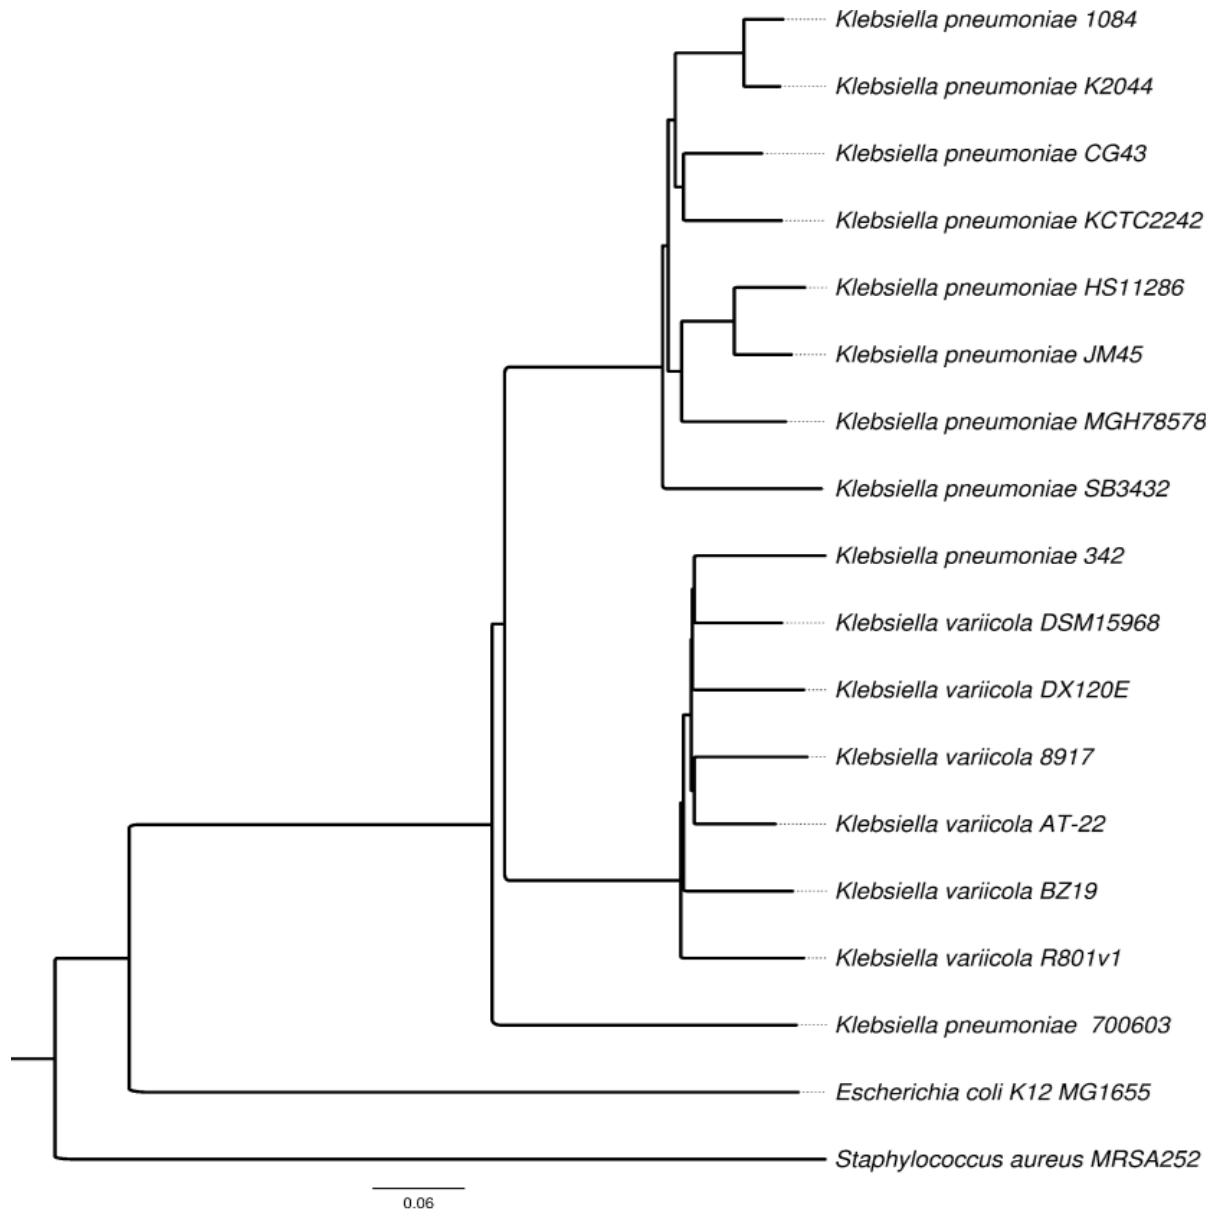

Supplementary Figure 1: Phylogenetic tree of *Klebsiella pneumoniae* and *Klebsiella variicola* clades. The *Escherichia coli* K12 MG1655 and *Staphylococcus aureus* MRSA252 strains were used as the outgroups.

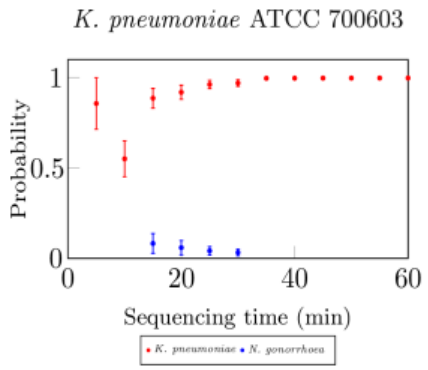

Supplementary Figure 2: Species typing result of *Klebsiella pneumoniae* ATCC-700603 strain when its reference assembly was included into the species database.

### Supplementary Note 3: Examining the profiles of most probable MLST types

In MLST typing of strain BAA-2146 using Nanopore sequencing data, we found the correct type (ST-11) tied with types ST-751 and ST-864 as the highest log-likelihood score (1985.47). By examining the gene allele profiles of these types, we found each of the types ST-751 and ST-864 differed to type ST-11 by only one gene allele (alleles rpoB\_46 and rpoB\_1 and alleles tonB\_2 and tonB\_4, See Supplementary Table 2). We aligned these gene alleles, and found that these differences were only by one SNP (See Supplementary Data.txt). We further examined the fourth and fifth highest score types (ST-1080 and ST-1680) and noticed that they also differed to the correct type by one gene allele. These alleles were respectively determined by a deletion of 2 bases (phoE\_164) and an insertion of four bases (tonB\_111). The ability to discriminate strains based on only a small difference clearly showed the usability of Nanopore sequencing data.

Supplementary Table 2: Profiles of top five five probable MLTS types probable MLTS types from typing strain BAA-2146. Each type differs to the correct type by only one gene allele.

| ST   | gapA | infB | mdh | pgi | phoE       | rpoB      | tonB       | Log-likelihood |
|------|------|------|-----|-----|------------|-----------|------------|----------------|
| 11   | 3    | 3    | 1   | 1   | 1          | 1         | 4          | 1985.47        |
| 751  | 3    | 3    | 1   | 1   | 1          | <b>46</b> | 4          | 1985.47        |
| 864  | 3    | 3    | 1   | 1   | 1          | 1         | <b>2</b>   | 1985.47        |
| 1080 | 3    | 3    | 1   | 1   | <b>164</b> | 1         | 4          | 1984.46        |
| 1680 | 3    | 3    | 1   | 1   | 1          | 1         | <b>111</b> | 1982.62        |

## REFERENCES:

- 1 Cao, M. D., Lloyd, A. & Trevor, D. I. in *Proceedings of the 22rd Australian Joint Conference on Artificial Intelligence* 71-80 (Springer Berlin Heidelberg, Melbourne, Australia, 2009).
- 2 Saitou, N. & Nei, M. The neighbor-joining method: a new method for reconstructing phylogenetic trees. *Molecular biology and evolution* **4**, 406-425 (1987).
- 3 PHYLIP (Phylogeny Inference Package) (Department of Genome Sciences, University of Washington, Seattle, 2005).
- 4 Kumar, V. *et al.* Comparative genomics of *Klebsiella pneumoniae* strains with different antibiotic resistance profiles. *Antimicrobial agents and chemotherapy* **55**, 4267-4276, doi:10.1128/AAC.00052-11 (2011).
